# Supplementary material
Source: publisher site journal article supplement (https://www.dovepress.com/article/602705)
Supplement: Supplementary file 1 [file 602705%20Revised%20Supplementary%20Materials.docx]

**Supplementary Table S1: Search strategies for bibliographic databases**

| **Database** | **Platform** | **Search Date** | **Final Search Strategy Summary** | **Records Retrieved** |
| --- | --- | --- | --- | --- |
| **PubMed** | NCBI | Nov 4, 2025 | ((“Multiple Sclerosis”[Mesh] OR “multiple sclerosis”[tiab] OR “MS”[tiab]) AND (“Pregnancy”[Mesh] OR “pregnant women”[tiab] OR “pregnancy”[tiab]) AND ((“Labor, Obstetric”[Mesh] OR “Delivery, Obstetric”[Mesh] OR “labor”[tiab] OR “labour”[tiab] OR “childbirth”[tiab] OR “delivery”[tiab] OR “intrapartum”[tiab]) OR (“Anesthesia, Obstetrical”[Mesh] OR “epidural”[tiab] OR “spinal”[tiab] OR “neuraxial”[tiab]) OR (“Cesarean Section”[Mesh] OR “cesarean”[tiab] OR “vaginal delivery”[tiab]))) AND (2020/01/01–2025/01/31[PDAT]) AND English[lang] NOT (Animals[Mesh] NOT Humans[Mesh]) | 119 |
| MEDLINE (Ovid) | OvidSP | Nov 12, 2025 | exp Multiple Sclerosis/ OR (multiple sclerosis or MS).mp. AND (exp Pregnancy/ OR exp Pregnant Women/ OR (pregnan* or gestation*).mp.) AND (exp Labor, Obstetric/ OR exp Delivery, Obstetric/ OR (labor or labour or childbirth or delivery or intrapartum).mp. OR exp Anesthesia, Obstetrical/ OR (epidural or spinal or neuraxial).mp. OR exp Cesarean Section/ OR (cesarean or vaginal delivery).mp.) Limits: 2020–2025, English, humans | 5,381 |
| CINAHL | EBSCOhost | Nov 19, 2025 | (MH “Multiple Sclerosis+”) OR TI (multiple sclerosis OR MS) OR AB (multiple sclerosis OR MS) AND (MH “Pregnancy+” OR MH “Expectant Mothers” OR TI (pregnan* OR gestation*) OR AB (pregnan* OR gestation*)) AND ((MH “Labor+” OR MH “Delivery+” OR MH “Childbirth” OR TI (labor OR labour OR delivery OR intrapartum) OR AB (labor OR labour OR delivery OR intrapartum)) OR (MH “Anesthesia, Obstetrical” OR MH “Analgesia, Obstetrical” OR TI (epidural OR spinal) OR AB (epidural OR spinal)) OR (MH “Cesarean Section+” OR TI (cesarean OR vaginal delivery) OR AB (cesarean OR vaginal delivery))) Limiters: 2020–2025, English, Exclude MEDLINE records | 168 |
| Scopus | Elsevier | Oct 3, 2025 | TITLE-ABS-KEY(“multiple sclerosis” OR ms) AND TITLE-ABS-KEY(pregnan* OR gestation* OR maternal) AND TITLE-ABS-KEY(labor OR labour OR delivery OR childbirth OR intrapartum OR epidural OR spinal OR cesarean OR “vaginal delivery” OR outcome*) AND PUBYEAR > 2018 AND PUBYEAR < 2026 AND (LIMIT-TO(LANGUAGE, “English”)) AND (LIMIT-TO(DOCTYPE, “ar”) OR LIMIT-TO(DOCTYPE, “re”) OR LIMIT-TO(DOCTYPE, “cp”) OR LIMIT-TO(DOCTYPE, “ch”)) | 184 |

**Search period:** January 2020 – January 2025 | **Language:** English | **Species:** Human **Footnotes:** MeSH, Medical Subject Headings; tiab, title/abstract; mp, multiple purpose (title, abstract, heading word, drug trade name, etc.); MH, CINAHL heading.

*An asterisk (*) indicates keywords used in the electronic database search strategy.*

**Supplementary Table S2: Summary of search results and screening flow**

| **Stage** | **Number of records** |
| --- | --- |
| **Bibliographic databases** |  |
| PubMed | 119 |
| MEDLINE (Ovid) | 5381 |
| CINAHL | 168 |
| Scopus | 184 |
| Subtotal (bibliographic databases) | 5852 |
| **Grey literature sources** | 329 |
| **Total before deduplication** | 6181 |
|  |  |
| **After deduplication (EndNote + manual)** | 2429 |
| Records screened (title/abstract) | 103 |
| Full-text articles assessed for eligibility | 69 |
| Full-text articles excluded (with reasons) | 58 |
| **Studies included in review** | **11** |

**Search sources:** 4 bibliographic databases + grey literature (Google Scholar, ProQuest Dissertations, ResearchGate, conference proceedings, guidelines, trial registries)

**Search validation:** Known-item check (5 pre-identified articles) = 100% retrieval. Search strategy peer-reviewed by a university professor.

**Footnote:** Grey literature sources included Google Scholar (first 200 results), ProQuest Dissertations, ResearchGate, ECTRIMS/ACTRIMS/AAN/ACOG conference proceedings, NMSS/MSIF/ACOG/NICE guidelines, and [ClinicalTrials.gov/WHO](https://clinicaltrials.gov/WHO) ICTRP trial registries.

**Appendix 1: Critical Appraisal for Quantitative Studies**

1. **Rahmati et al. (2024)26: Maternal and neonatal outcomes in pregnant women with multiple sclerosis disease – A systematic review and meta-analysis**

| **Criterion** | **Yes (2)** | **Partial (1)** | **No (0)** | **N/A** |
| --- | --- | --- | --- | --- |
| 1. Question / objective sufficiently described? | a |  |  |  |
| 2. Study design evident and appropriate? | a |  |  |  |
| 3. Method of subject/comparison group selection or source of information/input variables described and appropriate? | a |  |  |  |
| 4. Subject (and comparison group, if applicable) characteristics sufficiently described? | a |  |  |  |
| 5. If interventional and random allocation was possible, was it described? |  |  |  | b |
| 6. If interventional and blinding of investigators was possible, was it reported? |  |  |  | b |
| 7. If interventional and blinding of subjects was possible, was it reported? |  |  |  | b |
| 8. Outcome and (if applicable) exposure measure(s) well defined and robust to measurement / misclassification bias? Means of assessment reported? | a |  |  |  |
| 9. Sample size appropriate? |  |  |  | b |
| 10. Analytic methods described/justified and appropriate? | a |  |  |  |
| 11. Some estimate of variance is reported for the main results? |  |  |  | b |
| 12. Controlled for confounding? |  | c |  |  |
| 13. Results reported in sufficient detail? | a |  |  |  |
| 14. Conclusions supported by the results? | a |  |  |  |
| 1. Question / objective sufficiently described? | a |  |  |  |

**Methodological quality:** High

**Key strengths:** Large pooled sample size (over 33 million) and adherence to PRISMA guidelines.

**Key limitations:** Potential for confounding variables in the original observational studies included in the meta-analysis.

**Implications:** Confirms increased risk for cesarean delivery and certain neonatal outcomes, suggesting the need for detailed pregnancy planning.

**Footnotes:** a = Yes (score 2); b = Not applicable (systematic review of observational studies; no intervention); c = Partial (some confounding acknowledged but not fully controlled across all included studies).

###### **Paper Title: Disease course after pregnancy in women with progressive multiple sclerosis symptoms.**

###### **(Shipley et al., 2025)9**

| **Criterion** | **Yes (2)** | **Partial (1)** | **No (0)** | **N/A** |
| --- | --- | --- | --- | --- |
| 1. Question / objective sufficiently described? | a |  |  |  |
| 2. Study design evident and appropriate? | a |  |  |  |
| 3. Method of subject/comparison group selection or source of information/input variables described and appropriate? | a |  |  |  |
| 4. Subject (and comparison group, if applicable) characteristics sufficiently described? | a |  |  |  |
| 5. If interventional and random allocation was possible, was it described? |  |  |  | b |
| 6. If interventional and blinding of investigators was possible, was it reported? |  |  |  | b |
| 7. If interventional and blinding of subjects was possible, was it reported? |  |  |  | b |
| 8. Outcome and (if applicable) exposure measure(s) well defined and robust to measurement / misclassification bias? Means of assessment reported? | a |  |  |  |
| 9. Sample size appropriate? | a |  |  |  |
| 10. Analytic methods described/justified and appropriate? | a |  |  |  |
| 11. Some estimate of variance is reported for the main results? | a |  |  |  |
| 12. Controlled for confounding? |  |  | c |  |
| 13. Results reported in sufficient detail? | a |  |  |  |
| 14. Conclusions supported by the results? | a |  |  |  |

**Methodological quality:** High

**Key strengths:** Use of a large international registry and robust statistical matching (PSM) to minimize selection bias.

**Key limitations:** Significant difference in timing of postpartum visits between PPMS and SPMS cohorts.

**Implications:** Provides evidence that pregnancy does not significantly alter long-term disability in progressive MS.

**Footnotes:** a = Yes (score 2); b = Not applicable (observational registry study; no intervention); c = No (did not control for timing of postpartum visits).

1. **Hellwig et al. (2023)4: Multiple sclerosis disease activity and disability following cessation of fingolimod for pregnancy**

| **Criterion** | **Yes (2)** | **Partial (1)** | **No (0)** | **N/A** |
| --- | --- | --- | --- | --- |
| 1. Question / objective sufficiently described? | a |  |  |  |
| 2. Study design evident and appropriate? | a |  |  |  |
| 3. Method of subject/comparison group selection or source of information/input variables described and appropriate? | a |  |  |  |
| 4. Subject (and comparison group, if applicable) characteristics sufficiently described? | a |  |  |  |
| 5. If interventional and random allocation was possible, was it described? |  |  |  | b |
| 6. If interventional and blinding of investigators was possible, was it reported? |  |  |  | b |
| 7. If interventional and blinding of subjects was possible, was it reported? |  |  |  | b |
| 8. Outcome and (if applicable) exposure measure(s) well defined and robust to measurement / misclassification bias? Means of assessment reported? | a |  |  |  |
| 9. Sample size appropriate? | a |  |  |  |
| 10. Analytic methods described/justified and appropriate? | a |  |  |  |
| 11. Some estimate of variance is reported for the main results? | a |  |  |  |
| 12. Controlled for confounding? |  |  | c |  |
| 13. Results reported in sufficient detail? | a |  |  |  |
| 14. Conclusions supported by the results? | a |  |  |  |

**Methodological quality:** High

**Key strengths:** Large, well-characterized registry cohort and use of standardized telephone questionnaires to reduce missing data.

**Key limitations:** Observational nature means some severe relapses could not be fully rated if EDSS was missing.

**Implications:** Highlights about 6% risk of persistent disability from fingolimod-cessation relapses, informing preconception counseling.

**Footnotes:** a = Yes (score 2); b = Not applicable (observational registry study; no intervention); c = No (did not control for missing EDSS data on severe relapses).

Paper Title: Safety of neuraxial anesthesia in patients with multiple sclerosis: A systematic review of observational evidence.

(Shakeri, Gharehbeglou, & Avval, 2025)17

| **criterion** | **Yes (2)** | **Partial (1)** | **No (0)** | **N/A** |
| --- | --- | --- | --- | --- |
| 1. Question / objective sufficiently described? | a |  |  |  |
| 2. Study design evident and appropriate? | a |  |  |  |
| 3. Method of subject/comparison group selection or source of information/input variables described and appropriate? | a |  |  |  |
| 4. Subject (and comparison group, if applicable) characteristics sufficiently described? | a |  |  |  |
| 5. If interventional and random allocation was possible, was it described? |  |  |  | b |
| 6. If interventional and blinding of investigators was possible, was it reported? |  |  |  | b |
| 7. If interventional and blinding of subjects was possible, was it reported? |  |  |  | b |
| 8. Outcome and (if applicable) exposure measure(s) well defined and robust to measurement / misclassification bias? Means of assessment reported? | a |  |  |  |
| 9. Sample size appropriate? |  |  |  | b |
| 10. Analytic methods described/justified and appropriate? | a |  |  |  |
| 11. Some estimate of variance is reported for the main results? |  |  |  | b |
| 12. Controlled for confounding? |  | c |  |  |
| 13. Results reported in sufficient detail? | a |  |  |  |
| 14. Conclusions supported by the results? | a |  |  |  |

**Methodological Quality:** Moderate to High.

**Key Strengths:** Rigorous quality assessment of primary studies using NOS and NIH tools.

**Key Limitations:** Inclusion of many case reports (22), which represent lower levels of evidence

**Implications:** Suggests neuraxial anesthesia is generally safe but requires individualized assessment.

**Footnotes:** a = Yes (score 2); b = Not applicable (non-interventional observational evidence); c = No (Partial control for confounding variables).

1. Paper Title: Cesarean section in women with MS: A choice or a need?

###### (De Giglio et al., 2020)25

| **Criterion** | **Yes (2)** | **Partial (1)** | **No (0)** | **N/A** |
| --- | --- | --- | --- | --- |
| 1. Question / objective sufficiently described? | a |  |  |  |
| 2. Study design evident and appropriate? | a |  |  |  |
| 3. Method of subject/comparison group selection or source of information/input variables described and appropriate? | a |  |  |  |
| 4. Subject (and comparison group, if applicable) characteristics sufficiently described? | a |  |  |  |
| 5. If interventional and random allocation was possible, was it described? |  |  |  | b |
| 6. If interventional and blinding of investigators was possible, was it reported? |  |  |  | b |
| 7. If interventional and blinding of subjects was possible, was it reported? |  |  |  | b |
| 8. Outcome and (if applicable) exposure measure(s) well defined and robust to measurement / misclassification bias? Means of assessment reported? | a |  |  |  |
| 9. Sample size appropriate? | a |  |  |  |
| 10. Analytic methods described/justified and appropriate? | a |  |  |  |
| 11. Some estimate of variance is reported for the main results? | a |  |  |  |
| 12. Controlled for confounding? |  |  | c |  |
| 13. Results reported in sufficient detail? | a |  |  |  |
| 14. Conclusions supported by the results? | a |  |  |  |

**Methodological Quality:** Moderate.

**Key Strengths:** Inclusion of a healthy control group and clear differentiation between patients diagnosed before versus after pregnancy.

**Key Limitations:** Potential for recall bias due to questionnaire-based data collection and a lack of statistical control for confounding factors.

**Implications for Practice / Research:** Suggests a need for better communication between neurologists and gynecologists to ensure delivery decisions are based on clinical necessity rather than the MS diagnosis itself.

**Footnotes:** a = Yes (score = 2), b = Not applicable (observational non-interventional study),
c = No (confounding variables were not statistically controlled)

###### Paper Title: Consensus recommendations for family planning and pregnancy in multiple sclerosis in Argentina

###### (Liguori et al., 2020)22

###### Checklist for assessing the quality of quantitative studies

| **Criterion** | **Yes (2)** | **Partial (1)** | **No (0)** | **N/A** |
| --- | --- | --- | --- | --- |
| 1. Question / objective sufficiently described? | a |  |  |  |
| 2. Study design evident and appropriate? | a |  |  |  |
| 3. Method of subject/comparison group selection or source of information/input variables described and appropriate? | a |  |  |  |
| 4. Subject (and comparison group, if applicable) characteristics sufficiently described? | a |  |  |  |
| 5. If interventional and random allocation was possible, was it described? |  |  |  | b |
| 6. If interventional and blinding of investigators was possible, was it reported? |  |  |  | b |
| 7. If interventional and blinding of subjects was possible, was it reported? |  |  |  | b |
| 8. Outcome and (if applicable) exposure measure(s) well defined and robust to measurement / misclassification bias? Means of assessment reported? | a |  |  |  |
| 9. Sample size appropriate? |  |  |  | b |
| 10. Analytic methods described/justified and appropriate? | a |  |  |  |
| 11. Some estimate of variance is reported for the main results? | a |  |  |  |
| 12. Controlled for confounding? |  |  | c |  |
| 13. Results reported in sufficient detail? | a |  |  |  |
| 14. Conclusions supported by the results? | a |  |  |  |

**Methodological Quality:** High (as a consensus guideline).

**Key Strengths:** Use of a formal, rigorous consensus methodology and an extensive multidisciplinary panel.

**Key Limitations:** As a consensus guideline, it partially relies on expert opinion in areas where high-level evidence is limited (e.g., specific symptomatic treatments).

**Implications for Practice / Research:** Provides a standardized framework for reproductive care among women with MS in Argentina.

**Footnotes:** a = Yes (score = 2), b = Not applicable (consensus guideline; non-interventional),
c = No (confounding variables were not controlled statistically).

###### Paper Title: Patterns of disease-modifying therapy utilization before, during, and after pregnancy and postpartum relapses in women with multiple sclerosis

###### (Bove et al., 2024)23

###### Checklist for assessing the quality of quantitative studies

| **Criterion** | **Yes (2)** | **Partial (1)** | **No (0)** | **N/A** |
| --- | --- | --- | --- | --- |
| 1. Question / objective sufficiently described? | a |  |  |  |
| 2. Study design evident and appropriate? | a |  |  |  |
| 3. Method of subject/comparison group selection or source of information/input variables described and appropriate? | a |  |  |  |
| 4. Subject (and comparison group, if applicable) characteristics sufficiently described? | a |  |  |  |
| 5. If interventional and random allocation was possible, was it described? |  |  |  | b |
| 6. If interventional and blinding of investigators was possible, was it reported? |  |  |  | b |
| 7. If interventional and blinding of subjects was possible, was it reported? |  |  |  | b |
| 8. Outcome and (if applicable) exposure measure(s) well defined and robust to measurement / misclassification bias? Means of assessment reported? | a |  |  |  |
| 9. Sample size appropriate? | a |  |  |  |
| 10. Analytic methods described/justified and appropriate? | a |  |  |  |
| 11. Some estimate of variance is reported for the main results? | a |  |  |  |
| 12. Controlled for confounding? |  |  | c |  |
| 13. Results reported in sufficient detail? | a |  |  |  |
| 14. Conclusions supported by the results? | a |  |  |  |

**Methodological Quality:** High.

**Key Strengths:** Large sample size (n=944) and comparison between different socioeconomic groups (Commercial vs. Medicaid).

**Key Limitations:** Inherent limitations of claims data, such as limited information regarding the clinical rationale for DMT modifications.

**Implications for Practice / Research:** Supports early reinitiation of DMT postpartum to reduce relapse risk and highlights the substantial mental health burden experienced by pregnant women with MS.

**Footnotes:** a = Yes (score = 2), b = Not applicable (observational non-interventional study), c = No (confounding variables were not fully controlled statistically)

###### Paper Title: The role of pregnancy in relapsing-remitting MS prognosis: A five-year study

###### (Kaya, Aslan, Şimşek, Ozcelik, & Ozakbas, 2025)27

###### Checklist for assessing the quality of quantitative studies

| **Criterion** | **Yes (2)** | **Partial (1)** | **No (0)** | **N/A** |
| --- | --- | --- | --- | --- |
| 1. Question / objective sufficiently described? | a |  |  |  |
| 2. Study design evident and appropriate? | a |  |  |  |
| 3. Method of subject/comparison group selection or source of information/input variables described and appropriate? | a |  |  |  |
| 4. Subject (and comparison group, if applicable) characteristics sufficiently described? | a |  |  |  |
| 5. If interventional and random allocation was possible, was it described? |  |  |  | b |
| 6. If interventional and blinding of investigators was possible, was it reported? |  |  |  | b |
| 7. If interventional and blinding of subjects was possible, was it reported? |  |  |  | b |
| 8. Outcome and (if applicable) exposure measure(s) well defined and robust to measurement / misclassification bias? Means of assessment reported? | a |  |  |  |
| 9. Sample size appropriate? | a |  |  |  |
| 10. Analytic methods described/justified and appropriate? | a |  |  |  |
| 11. Some estimate of variance is reported for the main results? | a |  |  |  |
| 12. Controlled for confounding? |  |  | c |  |
| 13. Results reported in sufficient detail? | a |  |  |  |
| 14. Conclusions supported by the results? | a |  |  |  |

**Methodological Quality:** High.

**Key Strengths:** Use of a matched control group and inclusion of MRI data, which is often missing in long-term pregnancy studies.

**Key Limitations:** Retrospective design and a relatively small sample size in the group that experienced relapses during pregnancy “n=11”.

**Implications for Practice / Research:** Reassures patients that pregnancy does not appear to adversely affect long-term disability outcomes.

**Footnotes:** a = Yes (score = 2), b = Not applicable (observational non-interventional study),
c = No (confounding variables were not fully controlled statistically)

1. Paper Title: Disease Progression and Obstetric Outcomes of Women with Multiple Sclerosis at a Reference Center in Northeastern Brazil

(de Barros et al., 2021)21

Checklist for assessing the quality of quantitative studies

| **Criterion** | **Yes (2)** | **Partial (1)** | **No (0)** | **N/A** |
| --- | --- | --- | --- | --- |
| 1. Question / objective sufficiently described? | a |  |  |  |
| 2. Study design evident and appropriate? | a |  |  |  |
| 3. Method of subject/comparison group selection or source of information/input variables described and appropriate? | a |  |  |  |
| 4. Subject (and comparison group, if applicable) characteristics sufficiently described? | a |  |  |  |
| 5. If interventional and random allocation was possible, was it described? |  |  |  | b |
| 6. If interventional and blinding of investigators was possible, was it reported? |  |  |  | b |
| 7. If interventional and blinding of subjects was possible, was it reported? |  |  |  | b |
| 8. Outcome and (if applicable) exposure measure(s) well defined and robust to measurement / misclassification bias? Means of assessment reported? | a |  |  |  |
| 9. Sample size appropriate? |  | c |  |  |
| 10. Analytic methods described/justified and appropriate? | a |  |  |  |
| 11. Some estimate of variance is reported for the main results? | a |  |  |  |
| 12. Controlled for confounding? |  |  | d |  |
| 13. Results reported in sufficient detail? | a |  |  |  |
| 14. Conclusions supported by the results? | a |  |  |  |

**Methodological Quality:** Moderate.

**Key Strengths:** Provides rare real-world data from a specific regional context (Northeastern Brazil) and includes detailed data on accidental fingolimod exposure.

**Key Limitations:** Small sample size and retrospective design based on medical records and telephone interviews, which may introduce recall bias.

**Implications for Practice / Research:** Highlights very high cesarean rate (90.6%) likely driven by cultural factors and clinician concern, suggesting a need for better education on the safety of vaginal delivery in MS.

**Footnotes**: a = Yes (score = 2), b = Not applicable (observational non-interventional study), c = Partial (sample size was relatively small), d = No (confounding variables were not statistically controlled).

**Appendix 2: Critical Appraisal of Qualitative Studies**

###### Paper Title: Motherhood Experiences of Women With Multiple Sclerosis: A Thematic Meta-Synthesis

###### (Özkan & Polat Dünya, 2023)24

###### Checklist for assessing the quality of qualitative studies

| **Criteria** | **YES**  **(2)** | **PARTIAL**  **(1)** | **NO**  **(0)** |
| --- | --- | --- | --- |
| 1. Question / objective sufficiently described? | **√** |  |  |
| 1. Study design evident and appropriate? | **√** |  |  |
| 1. Context for the study clear? | **√** |  |  |
| 1. Connection to a theoretical framework / wider body of knowledge? | **√** |  |  |
| 1. Sampling strategy described, relevant and justified? | **√** |  |  |
| 1. Data collection methods clearly described and systematic? | **√** |  |  |
| 1. Data analysis clearly described and systematic? | **√** |  |  |
| 1. Use of verification procedure(s) to establish credibility? |  |  | **Unclear** |
| 1. Conclusions supported by the results? | **√** |  |  |
| 1. Reflexivity of the account? |  |  | **√** |

**Methodological Quality:** High

**Key Strengths:** Systematic approach to meta-synthesis; clear identification of relevant analytical themes that span the entire reproductive timeline.

**Key Limitations:** Lack of explicit reflexivity and specific verification details in the summary snippet.

**Implications for Practice / Research:** Provides healthcare professionals with an in-depth understanding of the motivation and challenges of mothers with MS, suggesting a need for more consistent and supportive communication.

1. Paper Title: Prenatal and Postnatal Opinions and Experiences of Women With Multiple Sclerosis: A Phenomenological Study

###### (Morante-Herrera, Martinez-Linares, & Lopez-Medina, 2024)3

###### Checklist for assessing the quality of qualitative studies

| **Criteria** | **YES**  **(2)** | **PARTIAL**  **(1)** | **NO**  **(0)** |
| --- | --- | --- | --- |
| 1. Question / objective sufficiently described? | **√** |  |  |
| 1. Study design evident and appropriate? | **√** |  |  |
| 1. Context for the study clear? | **√** |  |  |
| 1. Connection to a theoretical framework / wider body of knowledge? | **√** |  |  |
| 1. Sampling strategy described, relevant and justified? | **√** |  |  |
| 1. Data collection methods clearly described and systematic? | **√** |  |  |
| 1. Data analysis clearly described and systematic? | **√** |  |  |
| 1. Use of verification procedure(s) to establish credibility? |  |  | **Unclear** |
| 1. Conclusions supported by the results? | **√** |  |  |
| 1. Reflexivity of the account? |  |  | **√** |

**Methodological Quality:** High

**Key Strengths:** Strong alignment between the research aim and the phenomenological design; systematic use of intentional and snowball sampling to capture diverse provincial perspectives.

**Key Limitations:** Lack of explicit reflexivity in the summary; limited detail on specific credibility-verification procedures used.

**Implications for Practice / Research:** Vital for developing empathetic, patient-centered care models for women with MS during the prenatal and postnatal periods.
